# Supplementary material for: Clinical effects of blood donor characteristics in transfusion recipients: protocol of a framework to study the blood donor–recipient continuum
Source: PubMed Central journal article supplement — BMJ Open. 2015 Jan 17;5(1):e007412. doi: 10.1136/bmjopen-2014-007412 (PMC4305074; doi:10.1136/bmjopen-2014-007412), 2015-01-17
Supplement: bmjopen-2014-007412.reviewer_comments.pdf [file bmjopen-2014-007412.reviewer_comments.pdf]

## PEER REVIEW HISTORY

BMJ Open publishes all reviews undertaken for accepted manuscripts. Reviewers are asked to complete a checklist review form (<http://bmjopen.bmj.com/site/about/resources/checklist.pdf>) and are provided with free text boxes to elaborate on their assessment. These free text comments are reproduced below.

## ARTICLE DETAILS

|                            |                                                                                                                                                                                                       |
|----------------------------|-------------------------------------------------------------------------------------------------------------------------------------------------------------------------------------------------------|
| <b>TITLE (PROVISIONAL)</b> | Clinical Effects of Blood Donor Characteristics in Transfusion Recipients: protocol of a framework to study the blood donor-recipient continuum                                                       |
| <b>AUTHORS</b>             | Chassé, Michaël; McIntyre, Lauralyn; Tinmouth, Alan; Acker, Jason; English, Shane; Knoll, Greg; Shehata, Nadine; Forster, Alan; Wilson, Kumanan; van Walraven, Carl; Ducharme, Robin; Fergusson, Dean |

This article was not externally reviewed at BMJ Open. Protocols that have been independently assessed prior to submission to BMJ Open are usually fast-tracked to publication on the grounds that further substantial changes will not be possible. This independent assessment will usually be external, independent review for both a substantial grant award from a non-commercial or government funder and ethics approval.
